# Supplementary material for: Accurate reconstruction of bacterial pan- and core genomes with PEPPAN
Source: PubMed Central journal article supplement (PMC7605250; doi:10.1101/gr.260828.120), 2020-11
Supplement: supp_gr.260828.120_Supplemental_Fig_S2.pdf [file supp_gr.260828.120_Supplemental_Fig_S2.pdf]

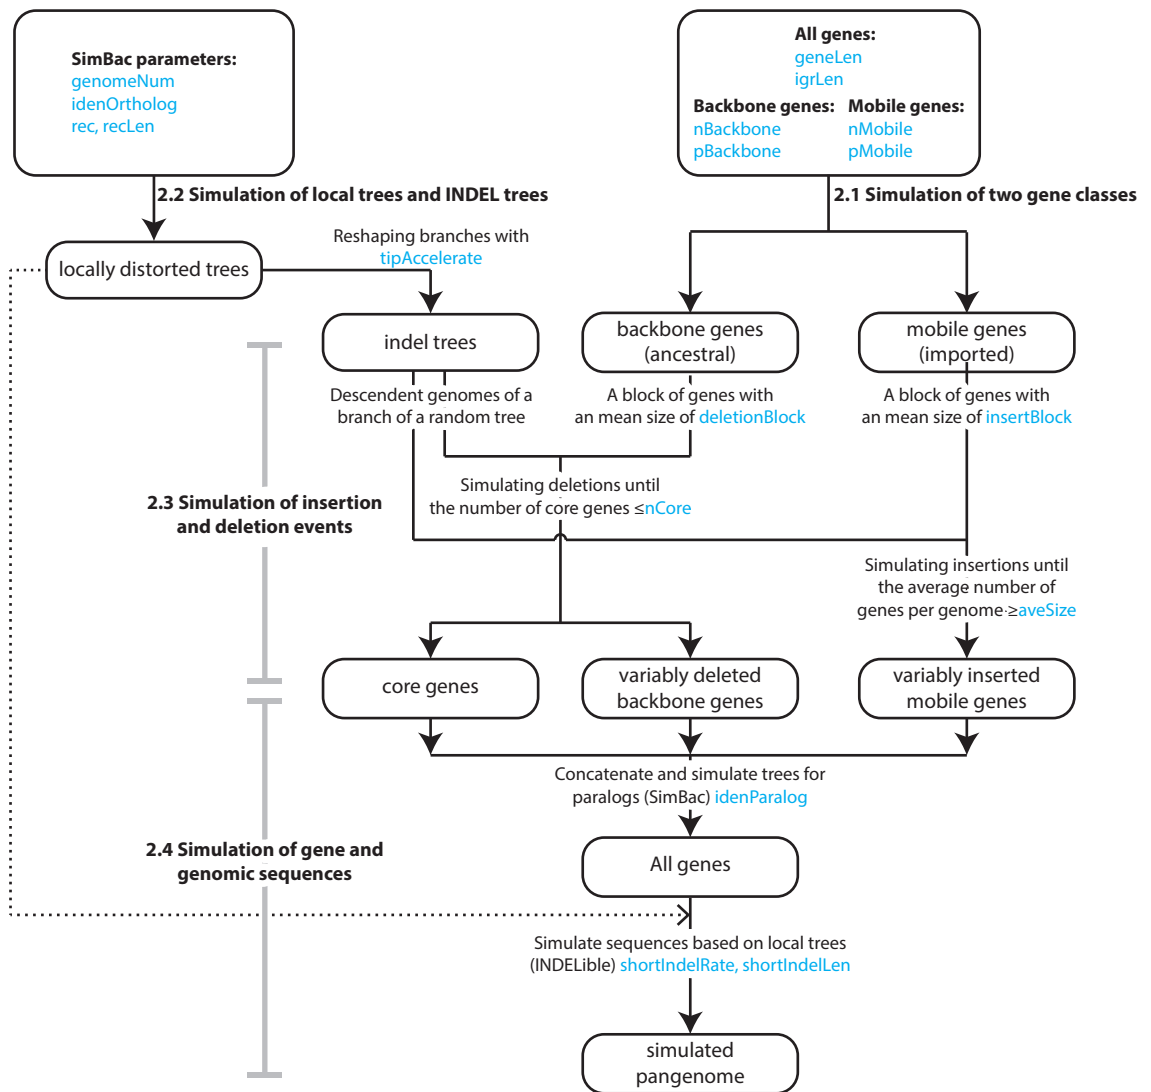

**Supplemental Figure S2. The detailed workflow of SimPan.** The operations initiated with 2.x and in bold fonts are sub-titles that corresponds to sub-titles in Supplemental Text 2. The words in blue are the names of the parameters to be specified by the users (Supplemental Table S1).
