# Supplementary material for: Accurate reconstruction of bacterial pan- and core genomes with PEPPAN
Source: HighWire-hosted journal article supplement (doi:10.1101/gr.260828.120), 2020-10-14
Supplement: Supplemental_Table_S1.pdf [file Supplemental_Table_S1.pdf]

Supplemental Table S1. Available options in SimPan

| Option         | Description                                                       | Default      |
|----------------|-------------------------------------------------------------------|--------------|
| genomeNum      | number of genomes in population                                   | 20           |
| idenOrtholog   | average nucleotide identities of orthologous genes                | 0.98         |
| rec            | expected proportion of homoplastic sites between pairs of genomes | 0.05         |
| recLen         | expected length (bp) of a recombinant event                       | 1000         |
| geneLen        | mean, minimum, and maximum gene length (bp)                       | 900,150,6000 |
| igrLen         | mean, minimum and maximum length (bp) of intergenic regions       | 50,0,300     |
| nBackbone      | number of backbone genes present in the common ancestor           | 4000         |
| pBackbone      | proportion of paralogs in the backbone genes                      | 0.05         |
| nMobile        | number of mobile genes                                            | 20000        |
| pMobile        | proportion of paralogs in the mobile genes                        | 0.4          |
| tipAccelerate  | gradient by which to accelerate rate of recent gene indel events  | 100          |
| deletionBlock  | mean, minimum and maximum number of genes in a deletion event     | 3,0,30       |
| insertBlock    | mean, minimum and maximum number of genes in an insertion event   | 10,0,100     |
| nCore          | number of strict core genes                                       | 3500         |
| aveSize        | average number of genes per genome                                | 4500         |
| idenParalog    | average nucleotide identities of paralogous genes                 | 0.6          |
| shortIndelRate | average frequency of indel events relative to mutation rates      | 0.01         |
| shortIndelLen  | average length (bp) of short indel events within a gene           | 10           |
